# Supplementary material
Source: publisher site journal article supplement (https://www.dovepress.com/article/410041)
Supplement: Supplementary file 1 [file get_supplementary_file.php]

**Supplementary content**

**Supplementary table 1.** Clinical characteristics of missed patients with HRVs

|  | Baveno IV | | | | Expanded Baveno IV | | | |
| --- | --- | --- | --- | --- | --- | --- | --- | --- |
|  | Not missed (n = 101) | | Missed (n = 8) | | Not missed (n = 123) | | Missed (n = 11) | |
|  | M (SD) | Median (Q1– Q3) | M (SD) | Median (Q1– Q3) | M (SD) | Median (Q1– Q3) | M (SD) | Median (Q1– Q3) |
| Age | 50.87 (13.4) | 53 (39–60.5) | 53.88 (7.49) | 53 (49.25–61.5) | 52.28 (13.22) | 54 (41.75–62.25) | 55.91 (9.69) | 53 (49–63) |
| BMI (kg/m2) | 33.35 (8) | 31.31 (27.5–36.1) | 32.26 (8.56) | 31.27 (26.06–38.14) | 33.42 (8.72) | 31.66 (27.35–37.46) | 31.15 (7.52) | 29.85 (25.6–34.09) |
| LSM (kPa) | 12.18 (8.8) | 11.8 (10.2–14.3) | 9.82 (3) | 11.15 (6.92–11.75) | 13.13 (4.42) | 12.1 (10.3–15.95) | 12.26 (5.74) | 11.3 (10.6–12.2) |
| Platelets (150,000–350,000/mL) | 240.15 (77.73) | 231 (186.5–266) | 194.75 (52.97) | 172 (167–207.5) | 225.14 (80.41) | 214 (164.5–252.25) | 187.27 (54.24) | 172 (165–217) |
| ALT (5–55 U/L) | 70.15 (93.92) | 42.5 (27–66.75) | 103.63 (119.42) | 54 (27.75–159) | 68.8 (94.73) | 37 (26–66.5) | 95.82 (103.99) | 71 (27–134) |
| AST (5–34 U/L) | 43.84 (43.48) | 28 (21–50.5) | 52.38 (45.08) | 27 (18–90.25) | 46.46 (56.45) | 28 (21–49) | 52.18 (42.72) | 27 (16–91) |
| BILI (0.2–1.2 mg/dl) | 0.7 (0.84) | 0.5 (0.4–0.7) | 0.56 (0.22) | 0.5 (0.4–0.7) | 0.73 (0.86) | 0.5 (0.4–0.8) | 0.58 (0.24) | 0.5 (0.4–0.7) |
| Albumin (3.2–5.2 g/dL) | 3.64 (0.39) | 3.7 (3.4–3.9) | 3.55 (0.68) | 3.65 (3.22–4.12) | 3.66 (0.4) | 3.7 (3.4–3.92) | 3.57 (0.57) | 3.6 (3.6–3.9) |
| Creatinine (0.6–1.3 mg/dL) | 2.49 (13.3) | 0.83 (0.69–1) | 1.39 (1.73) | 0.82 (0.61–1.06) | 3.27 (17.1) | 0.84 (0.69–1) | 1.2 (1.49) | 0.8 (0.6–0.94) |
| INR (0.8–1.0 s) | 1.02 (0.11) | 1.01 (0.96–1.07) | 1.08 (0.13) | 1.01 (0.98–1.22) | 1.04 (0.16) | 1.01 (0.97–1.08) | 1.07 (0.11) | 1.03 (0.99–1.13) |
| MELD | 8.15 (3.51) | 7 (6–8) | 9.13 (4.99) | 7 (6.25–9.75) | 8.19 (3.36) | 7 (6–8) | 8.64 (4.27) | 7 (7–9) |
|  | n | % | n | % | n | % | n | % |
| Females | 51 | 0.505 | 4 | 0.5 | 67 | 0.532 | 6 | 0.545 |
| Males | 50 | 0.495 | 4 | 0.5 | 59 | 0.468 | 5 | 0.455 |
| Saudi nationality | 87 | 0.861 | 7 | 0.875 | 107 | 0.849 | 10 | 0.909 |
| Other nationality | 14 | 0.139 | 1 | 0.125 | 19 | 0.151 | 1 | 0.091 |
| CTP Score |  |  |  |  |  |  |  |  |
| Class A | 93 | 0.921 | 7 | 0.875 | 116 | 0.921 | 10 | 0.909 |
| Class B | 7 | 0.069 | 1 | 0.125 | 9 | 0.071 | 1 | 0.091 |
| Etiology of cACLD |  |  |  |  |  |  |  |  |
| HCV | 28 | 0.277 | 3 | 0.375 | 40 | 0.317 | 5 | 0.455 |
| HBV | 27 | 0.267 | 1 | 0.125 | 31 | 0.246 | 1 | 0.091 |
| NAFLD | 40 | 0.396 | 4 | 0.5 | 47 | 0.373 | 5 | 0.455 |
| Other | 6 | 0.059 | 0 | 0 | 8 | 0.063 | 0 | 0 |

Note: None of the differences were statistically significant.
